# Supplementary material for: Facile and green one-step synthesis of Ni3S2@CN carbon nanosheets from sodium lignosulfonate for a supercapacitor electrode
Source: Royal Society of Chemistry journal article supplement (doi:10.1039/d1se00946j), 2021-01-01
Supplement: d1se00946j1.pdf [file d1se00946j1.pdf]

## Supporting information

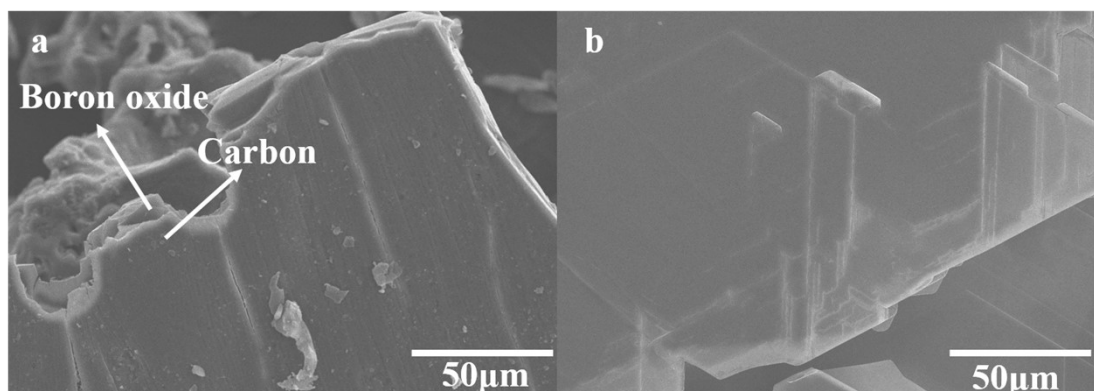

Fig. S1 SEM images (a) revealing the formation of carbon nanosheets on boron oxide nanoplate; SEM image (b) of boron oxide at high temperature.

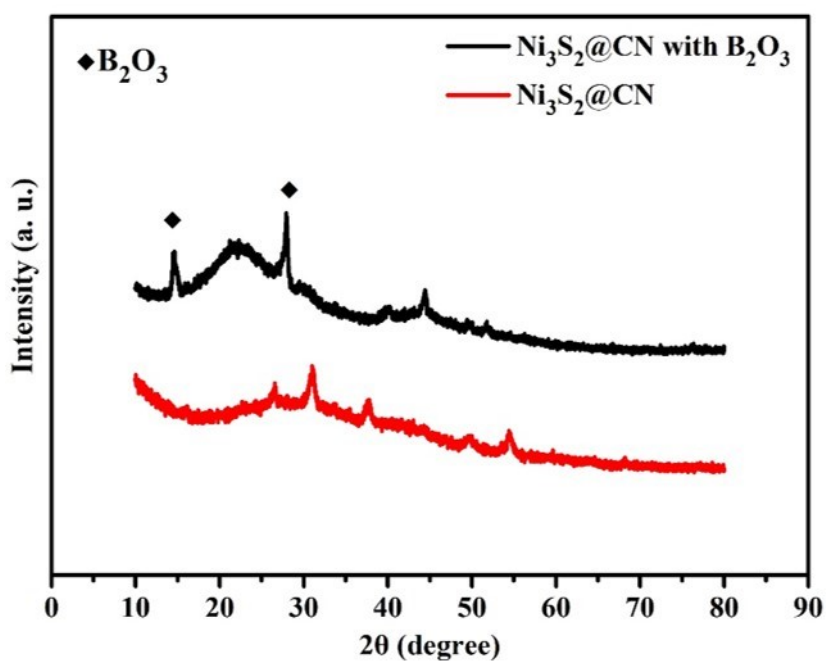

Fig. S2 XRD profile of the materials before and after refluxing in the boiling water.

---

Table S1 chemical information of Ni<sub>3</sub>S<sub>2</sub>@CN-0.4-700

| Name | Atomic % |
|------|----------|
| S2p  | 1.8      |
| C1s  | 80.18    |
| O1s  | 13.79    |
| Ni2p | 3.4      |
